# Supplementary material
Source: Springer Nature journal article supplement (https://www.springermedizin.de/resource/supplementary/12936_2011_1689_MOESM4_ESM.pdf/9541510)

1: Delhi, 2: Mohan Nagar, 3: Aligarh  
 4: Mirzapur, 5: Panna, 6: Nadiad  
 7: Navi Mumbai, 8: Goa, 9: Chennai  
 10: Cuttack, 11: Kamrup, 12: Car Nicobar

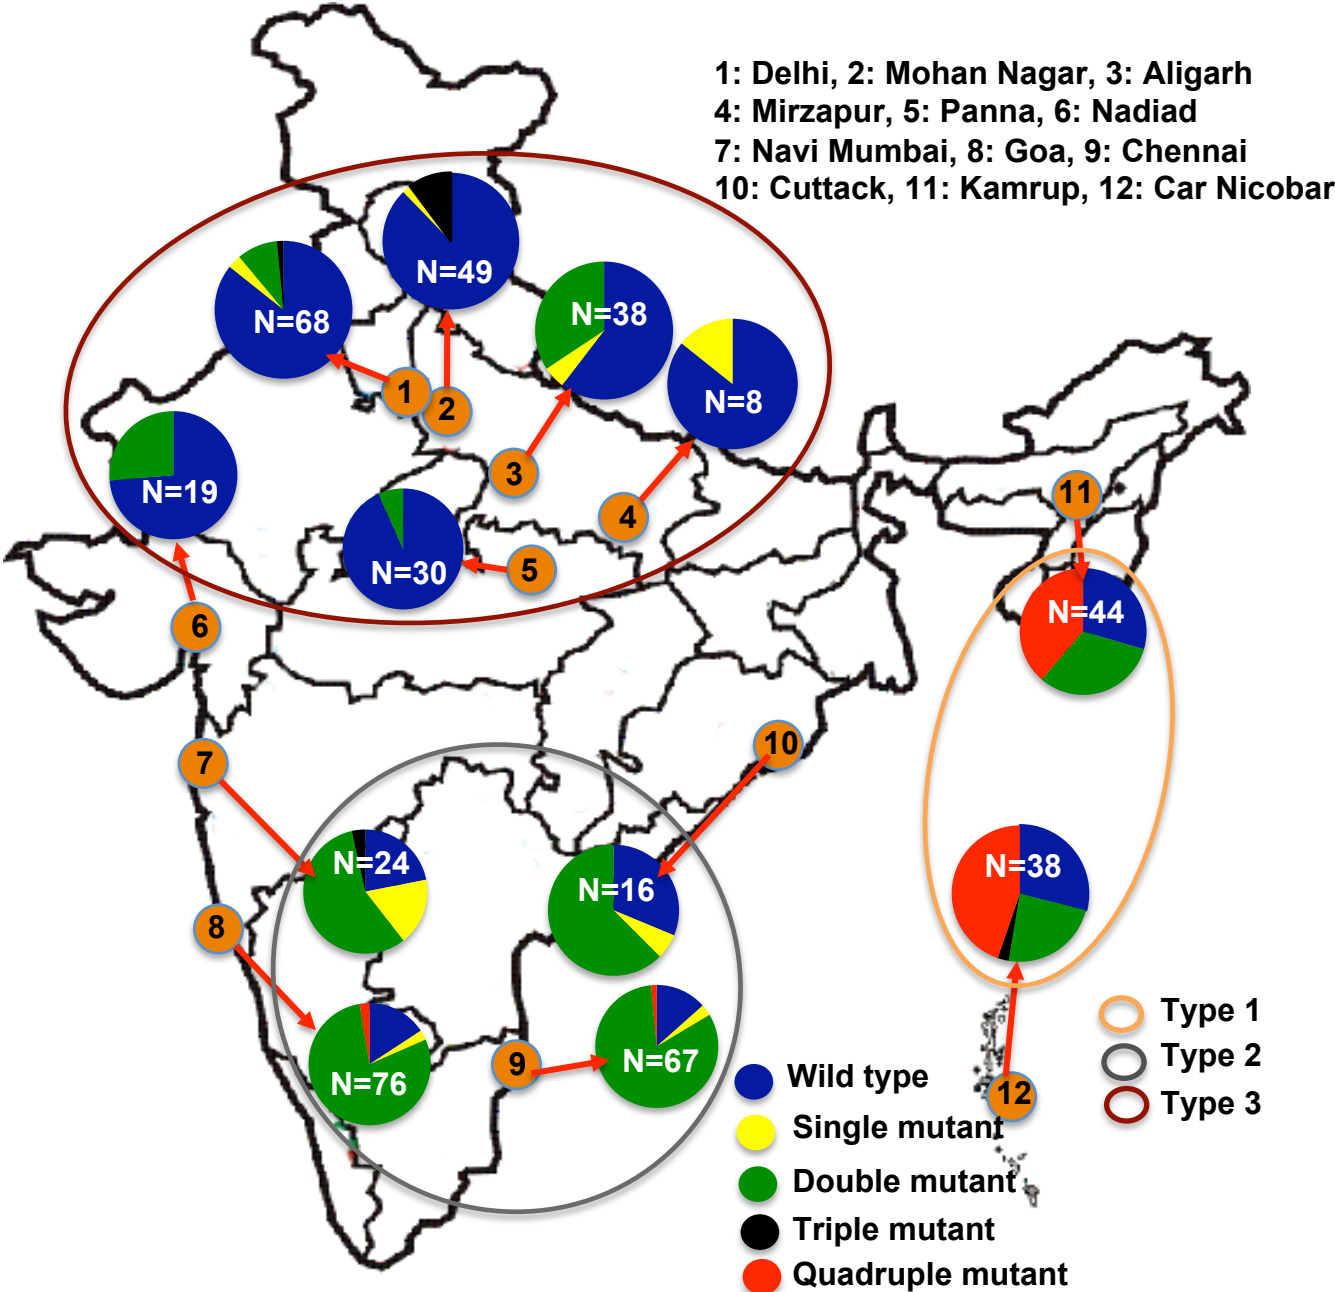

Supplement: MOESM4 [file 9541510]
